# Supplementary material
Source: PubMed Central journal article supplement (PMC3371131)

Figure S1

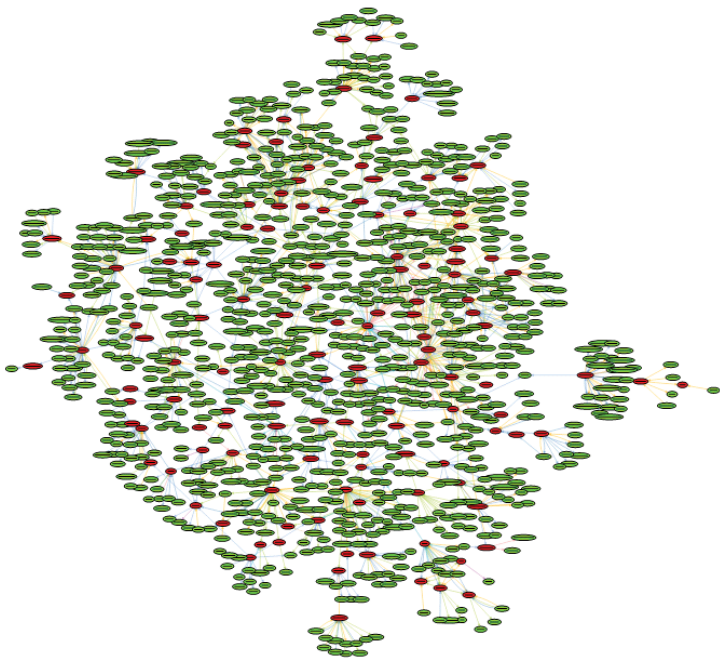

Supplement: NIHMS373890-supplement-05.pdf [file NIHMS373890-supplement-05.pdf]
